# Supplementary material for: Life Goals Collaborative Care for Patients With Bipolar Disorder and Cardiovascular Disease Risk
Source: Atypon-hosted journal article supplement (doi:10.1176/appi.ps.201100528), 2012-12-01
Supplement: 1234_ds001.pdf [file 1234_ds001.pdf]

**APPENDIX:**  
**Repeated Measures Analysis: 12-Month Outcomes Comparing Life Goals Collaborative Care (LGCC)**  
**Versus Enhanced Treatment as Usual among Patients with Elevated Cardiometabolic Risk Factors**

| N=50<br>Patients with<br>BMI >=30<br>Cardiometabolic<br>Risk | LGCC (N=21) |      |         |      |          |      | Enhanced Treatment as Usual (N=29) |      |         |      |          |      | Repeated Measures Analysis <sup>d</sup> |           |      |    |     |                |
|--------------------------------------------------------------|-------------|------|---------|------|----------|------|------------------------------------|------|---------|------|----------|------|-----------------------------------------|-----------|------|----|-----|----------------|
|                                                              | Baseline    |      | 6 month |      | 12 month |      | Baseline                           |      | 6 month |      | 12 month |      | Beta                                    | 95% CI    | T    | df | P   | D <sup>e</sup> |
|                                                              | Mean        | SD   | Mean    | SD   | Mean     | SD   | Mean                               | SD   | Mean    | SD   | Mean     | SD   |                                         |           |      |    |     |                |
| BMI                                                          | 36.2        | 5.3  | 35.9    | 6.5  | 35.0     | 5.0  | 38.7                               | 7.1  | 38.9    | 8.0  | 39.0     | 9.4  | -.44                                    | -1.5, .6  | -.8  | 47 | .40 | -.05           |
| Waist circumference, in                                      | 44.9        | 5.1  | 46.6    | 6.3  | 44.6     | 6.7  | 48.3                               | 5.3  | 50.6    | 5.9  | 48.0     | 5.9  | -.63                                    | -1.9, .6  | -.9  | 47 | .32 | -.12           |
| Blood pressure-systolic mmHg                                 | 131.1       | 13.2 | 134.5   | 12.1 | 135.1    | 17.4 | 139.3                              | 24.8 | 135.8   | 14.2 | 138.8    | 17.7 | -2.22                                   | -6.9, 2.5 | -.9  | 47 | .34 | -.01           |
| Blood pressure-diastolic mmHg                                | 84.6        | 10.4 | 84.2    | 13.0 | 84.5     | 11.4 | 86.9                               | 12.6 | 86.2    | 13.8 | 85.5     | 12.4 | -1.48                                   | -4.9, 1.9 | -.9  | 47 | .38 | -.13           |
| <b>Quality of Life<sup>a</sup></b>                           |             |      |         |      |          |      |                                    |      |         |      |          |      |                                         |           |      |    |     |                |
| SF-12 MCS                                                    | 32.1        | 7.7  | 32.4    | 7.1  | 34.7     | 5.0  | 30.0                               | 6.7  | 31.6    | 8.3  | 30.1     | 6.6  | -.34                                    | -2.6, 1.9 | -.3  | 47 | .75 | -.06           |
| SF-12 PCS                                                    | 34.3        | 7.7  | 35.9    | 6.9  | 36.0     | 9.7  | 37.0                               | 9.0  | 35.0    | 7.3  | 34.5     | 7.3  | 1.67                                    | -.6, 3.9  | 1.5  | 47 | .14 | .23            |
| <b>Functioning<sup>b</sup></b>                               | 18.0        | 10.7 | 16.7    | 8.2  | 15.3     | 12.8 | 21.3                               | 7.7  | 20.5    | 6.2  | 21.5     | 7.9  | -2.07                                   | -4.0,-.1  | -2.1 | 47 | .04 | -.29           |
| <b>Symptoms<sup>c</sup></b>                                  |             |      |         |      |          |      |                                    |      |         |      |          |      |                                         |           |      |    |     |                |
| Depressive                                                   | 8.0         | 6.2  | 5.6     | 5.7  | 5.5      | 5.5  | 9.9                                | 6.2  | 9.5     | 6.5  | 9.8      | 6.8  | -2.02                                   | -3.9,-.1  | -2.1 | 47 | .04 | -.39           |
| Manic                                                        | 17.2        | 13.1 | 19.2    | 16.1 | 18.3     | 17.8 | 22.1                               | 10.7 | 22.0    | 12.1 | 18.1     | 10.8 | .58                                     | -3.2, 4.4 | .3   | 47 | .75 | .07            |

- Health-related quality of life (SF-12) includes a mental health (MCS) and physical health component score (PCS). Possible scores range from 0 to 100, with higher scores indicating better health scores. For both summary scores, the population  $M \pm SD$  is  $50 \pm 10$ .
- Impaired functioning was assessed using the World Health Organization Disability Assessment Scale, a 12 item measure that assesses the degree of functional impairment experienced over the past month regarding self-care, mobility, cognition, social functioning, and role functioning, with possible scores ranging from 0 to 48 (higher scores indicating worse functioning).
- Symptom scores were based on the Internal State Scale, an 8-item assessment of depressive and manic symptoms that are strongly correlated with clinician ratings. For depressive symptoms, possible scores range from 0 to 20. For manic symptoms, possible scores range from 0 to 50, Higher score indicate more severe symptoms.
- Repeated measures analysis adjusted for the baseline value of the outcome, effect of the Life Goals Collaborative Care (LGCC), time (6, 12 months), and the interaction of time and LGCC effect.
- Cohen's D is a measure of effect size, with  $D > .3$  indicating small to moderate effect

**Repeated Measures Analysis: 12-Month Outcomes Comparing Life Goals Collaborative Care (LGCC)  
Versus Enhanced Treatment as Usual among Patients with Elevated Cardiometabolic Risk Factors (continued)**

| N=20<br>Patients with<br>Systolic blood<br>pressure >=140<br>Cardiometabolic<br>Risk | LGCC (N=8) |      |         |      |          |      | Enhanced Treatment as Usual (N=12) |      |         |      |          |      | Repeated Measures Analysis <sup>d</sup> |            |      |    |     |                |
|--------------------------------------------------------------------------------------|------------|------|---------|------|----------|------|------------------------------------|------|---------|------|----------|------|-----------------------------------------|------------|------|----|-----|----------------|
|                                                                                      | Baseline   |      | 6 month |      | 12 month |      | Baseline                           |      | 6 month |      | 12 month |      | Beta                                    | 95% CI     | T    | df | P   | D <sup>e</sup> |
|                                                                                      | Mean       | SD   | Mean    | SD   | Mean     | SD   | Mean                               | SD   | Mean    | SD   | Mean     | SD   |                                         |            |      |    |     |                |
| BMI                                                                                  | 35.1       | 7.9  | 35.4    | 8.5  | 36.3     | 6.0  | 40.2                               | 7.8  | 41.9    | 8.9  | 41.2     | 11.7 | .69                                     | -.6, 2.0   | 1.1  | 17 | .28 | .09            |
| Waist<br>circumference, in                                                           | 45.0       | 7.2  | 49.1    | 8.0  | 48.6     | 5.8  | 50.0                               | 4.1  | 52.9    | 6.2  | 49.0     | 5.4  | 1.02                                    | -1.4, 3.4  | .9   | 17 | .38 | .22            |
| Blood pressure-<br>systolic mmHg                                                     | 147.5      | 3.3  | 145.7   | 14.9 | 151.8    | 15.0 | 162.8                              | 21.3 | 142.6   | 14.7 | 148.6    | 25.1 | 4.58                                    | -5.3, 14.5 | .9   | 17 | .34 | .21            |
| Blood pressure-<br>diastolic mmHg                                                    | 91.4       | 11.4 | 94.2    | 13.7 | 95.3     | 7.5  | 93.1                               | 12.2 | 94.6    | 11.7 | 87.      | 15.1 | 1.85                                    | -5.1, 8.8  | .6   | 17 | .58 | .16            |
| <b>Quality of Life<sup>a</sup></b>                                                   |            |      |         |      |          |      |                                    |      |         |      |          |      |                                         |            |      |    |     |                |
| SF-12 MCS                                                                            | 28.2       | 9.1  | 33.4    | 8.4  | 37.0     | 4.7  | 30.5                               | 8.4  | 28.3    | 8.0  | 30.3     | 8.2  | 1.75                                    | -1.6, 5.1  | 1.1  | 17 | .27 | .28            |
| SF-12 PCS                                                                            | 35.7       | 9.5  | 39.3    | 8.6  | 34.8     | 11.7 | 34.7                               | 7.1  | 34.3    | 6.6  | 35.3     | 7.3  | 1.43                                    | -1.7, 4.5  | .9   | 17 | .33 | .29            |
| <b>Functioning<sup>b</sup></b>                                                       | 16.4       | 11.3 | 13.4    | 8.5  | 15.3     | 15.4 | 24.7                               | 8.1  | 23.0    | 5.6  | 23.3     | 8.1  | -3.82                                   | -7.4, -.3  | -2.3 | 17 | .04 | -.61           |
| <b>Symptoms<sup>c</sup></b>                                                          |            |      |         |      |          |      |                                    |      |         |      |          |      |                                         |            |      |    |     |                |
| Depressive                                                                           | 9.6        | 7.9  | 5.7     | 6.7  | 3.8      | 5.9  | 10.8                               | 6.9  | 12.3    | 7.2  | 12.3     | 8.6  | -3.52                                   | -6.8, -.2  | -2.3 | 17 | .04 | -.65           |
| Manic                                                                                | 14.7       | 13.9 | 17.9    | 16.6 | 22.5     | 21.4 | 19.0                               | 10.1 | 26.0    | 16.3 | 12.4     | 6.6  | .70                                     | -5.8, 7.2  | .2   | 17 | .82 | .07            |

a. Health-related quality of life (SF-12) includes a mental health (MCS) and physical health component score (PCS). Possible scores range from 0 to 100, with higher scores indicating better health scores. For both summary scores, the population  $M \pm SD$  is  $50 \pm 10$ .

b. Impaired functioning was assessed using the World Health Organization Disability Assessment Scale, a 12 item measure that assesses the degree of functional impairment experienced over the past month regarding self-care, mobility, cognition, social functioning, and role functioning, with possible scores ranging from 0 to 48 (higher scores indicating worse functioning).

c. Symptom scores were based on the Internal State Scale, an 8-item assessment of depressive and manic symptoms that are strongly correlated with clinician ratings. For depressive symptoms, possible scores range from 0 to 20. For manic symptoms, possible scores range from 0 to 50, Higher score indicate more severe symptoms.

d. Repeated measures analysis adjusted for the baseline value of the outcome, effect of the Life Goals Collaborative Care (LGCC), time (6, 12 months), and the interaction of time and LGCC effect.

e. Cohen's D is a measure of effect size, with  $D > .3$  indicating small to moderate effect

**Service Utilization Comparing Patients with Bipolar Disorder Enrolled in  
LGCC Versus Enhanced Treatment as Usual from Baseline to 12-Month Follow-up**

|                                                          | Total<br>(N= 47) |      | LGCC<br>(N=24) |      | Enhanced<br>Treatment<br>as Usual<br>(N=23) |      |                                   |    |         |
|----------------------------------------------------------|------------------|------|----------------|------|---------------------------------------------|------|-----------------------------------|----|---------|
|                                                          | N                | %    | N              | %    | N                                           | %    | t or Chi-<br>Square<br>statistics | df | p-value |
| <b>Service utilization</b>                               |                  |      |                |      |                                             |      |                                   |    |         |
| # General Medical visits                                 | 5.2±6.8          |      | 5.5±7.6        |      | 4.9±6.0                                     |      | -.31                              | 63 | .76     |
| 0 visits                                                 | 18               | 38.3 | 9              | 37.5 | 9                                           | 39.1 | .71                               | 1  | .91     |
| 1-2 visits                                               | 10               | 21.3 | 6              | 25.0 | 4                                           | 17.4 |                                   |    |         |
| 3-5 visits                                               | 3                | 6.4  | 1              | 4.2  | 2                                           | 8.7  |                                   |    |         |
| 6 or more visits                                         | 16               | 34.0 | 8              | 33.3 | 8                                           | 34.8 |                                   |    |         |
| # Mental health visits                                   | 12.8±6.1         |      | 13.8±5.3       |      | 11.7±6.8                                    |      | -1.14                             | 63 | .26     |
| 0 visits                                                 | 1                | 2.1  | 0              | 0    | 1                                           | 4.4  | 2.19                              | 1  | .61     |
| 1-2 visits                                               | 1                | 2.1  | 0              | 0    | 1                                           | 4.4  |                                   |    |         |
| 3-5 visits                                               | 2                | 4.3  | 1              | 4.2  | 1                                           | 4.4  |                                   |    |         |
| 6 or more visits                                         | 43               | 91.5 | 23             | 95.8 | 20                                          | 87.0 |                                   |    |         |
| # Inpatient admissions                                   | .3±.8            |      | .3±.8          |      | .2±.9                                       |      | -.49                              | 63 | .62     |
| 0 admissions                                             | 40               | 85.1 | 19             | 79.2 | 21                                          | 91.3 | 1.37                              | 1  | .42     |
| 1 or more admissions                                     | 7                | 14.9 | 5              | 20.8 | 2                                           | 8.7  |                                   |    |         |
| # ER visits                                              | .5±.9            |      | .4±.7          |      | .6±1.0                                      |      | .57                               | 63 | .57     |
| 0 visits                                                 | 32               | 68.1 | 16             | 66.7 | 16                                          | 69.6 | .05                               | 1  | .83     |
| 1 or more visits                                         | 15               | 31.9 | 8              | 33.3 | 7                                           | 30.4 |                                   |    |         |
| <b>Specific programs at sites<br/>(not part of LGCC)</b> |                  |      |                |      |                                             |      |                                   |    |         |
| Diet/Exercise counseling at site                         | 19               | 40.4 | 12             | 50.0 | 7                                           | 30.4 | 1.87                              | 1  | .17     |
| Wellness program                                         | 7                | 14.9 | 3              | 12.5 | 4                                           | 17.4 | .22                               | 1  | .64     |
| Tobacco cessation                                        | 15               | 31.9 | 9              | 37.5 | 6                                           | 26.1 | .70                               | 1  | .40     |
